# Supplementary material
Source: PubMed Central journal article supplement (PMC6226012)

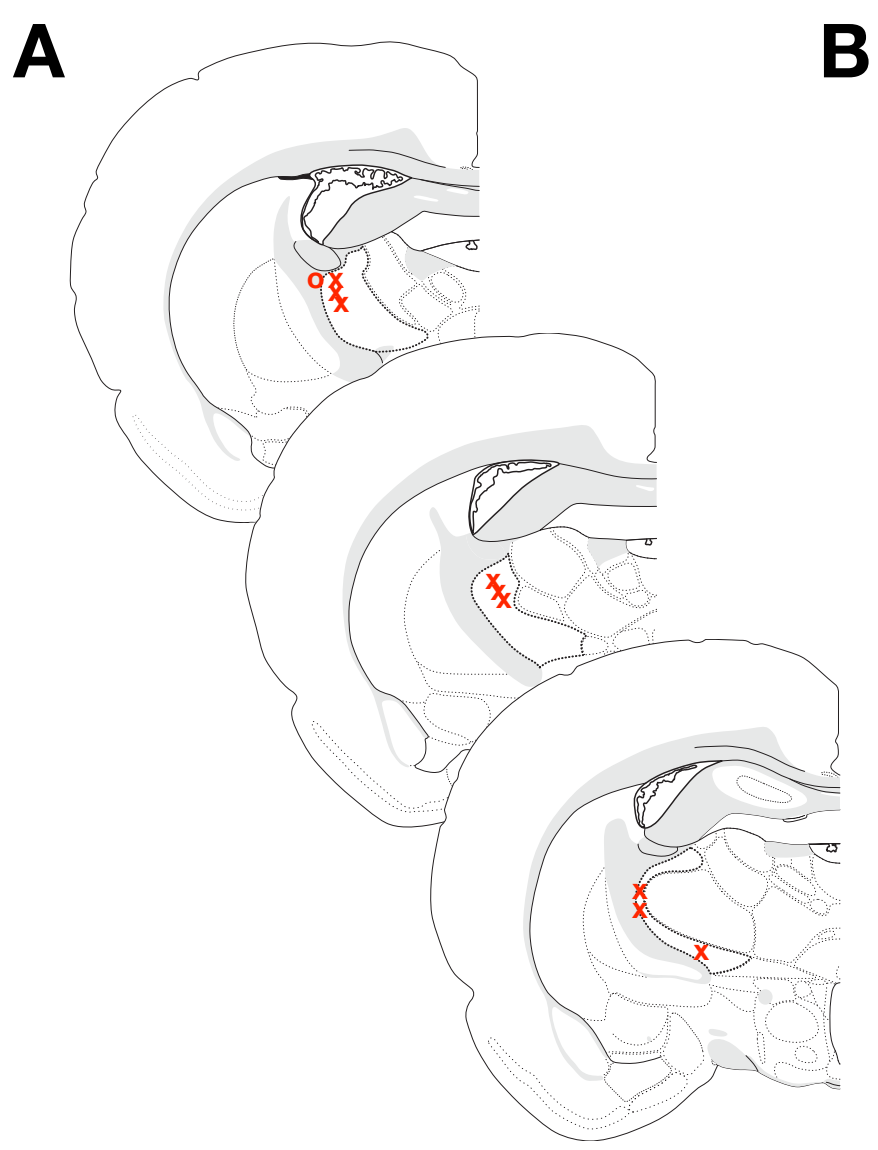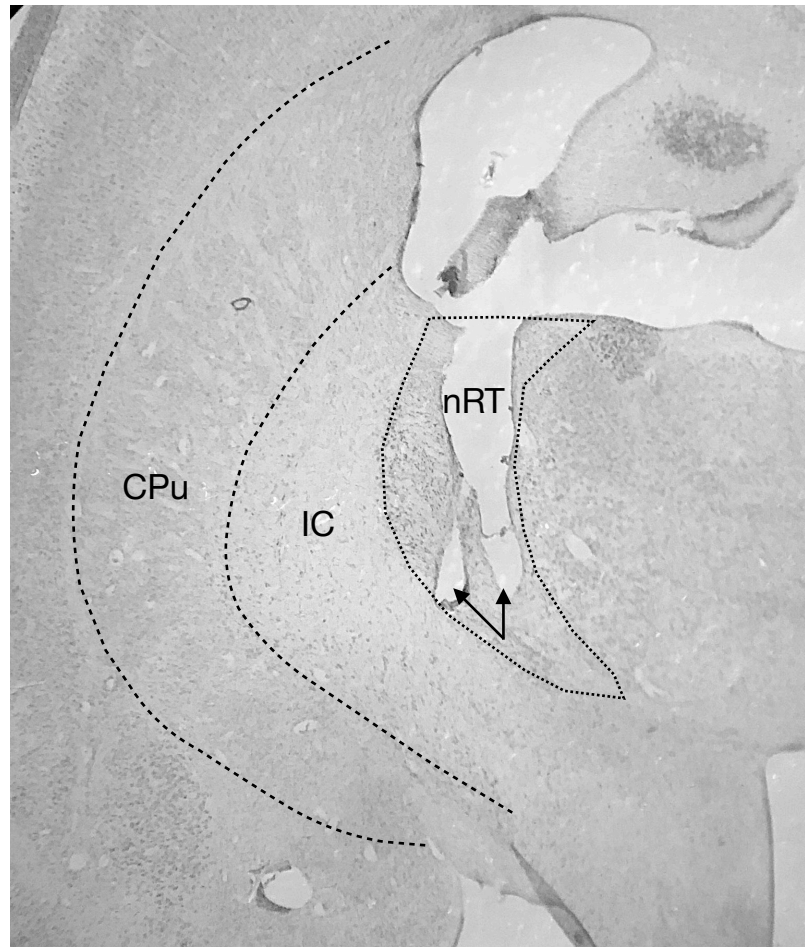

Supplement: NIHMS1507963-supplement-1.pdf [file NIHMS1507963-supplement-1.pdf]
